# Supplementary material
Source: publisher site journal article supplement (https://www.dovepress.com/article/213526)

Figure S1:

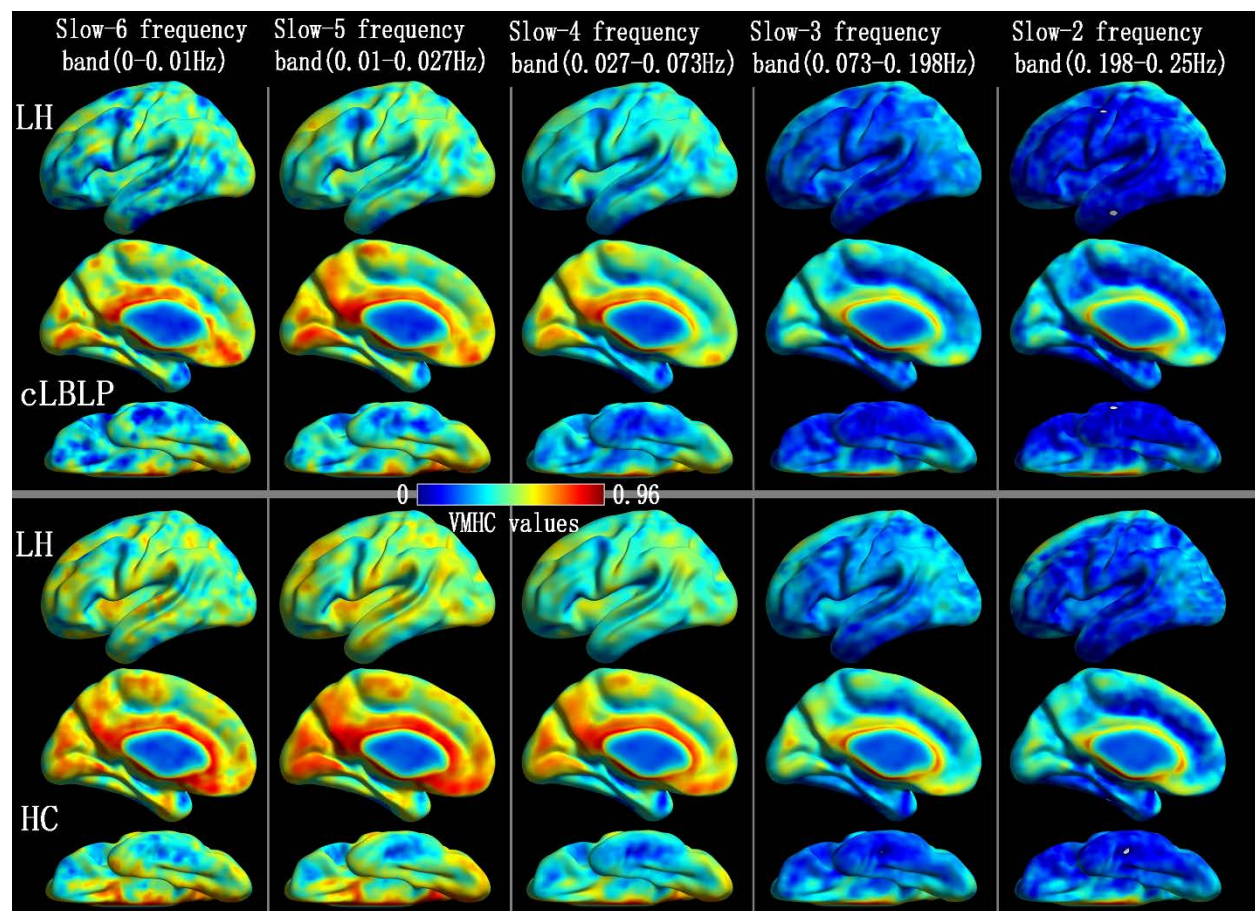

Figure S2:

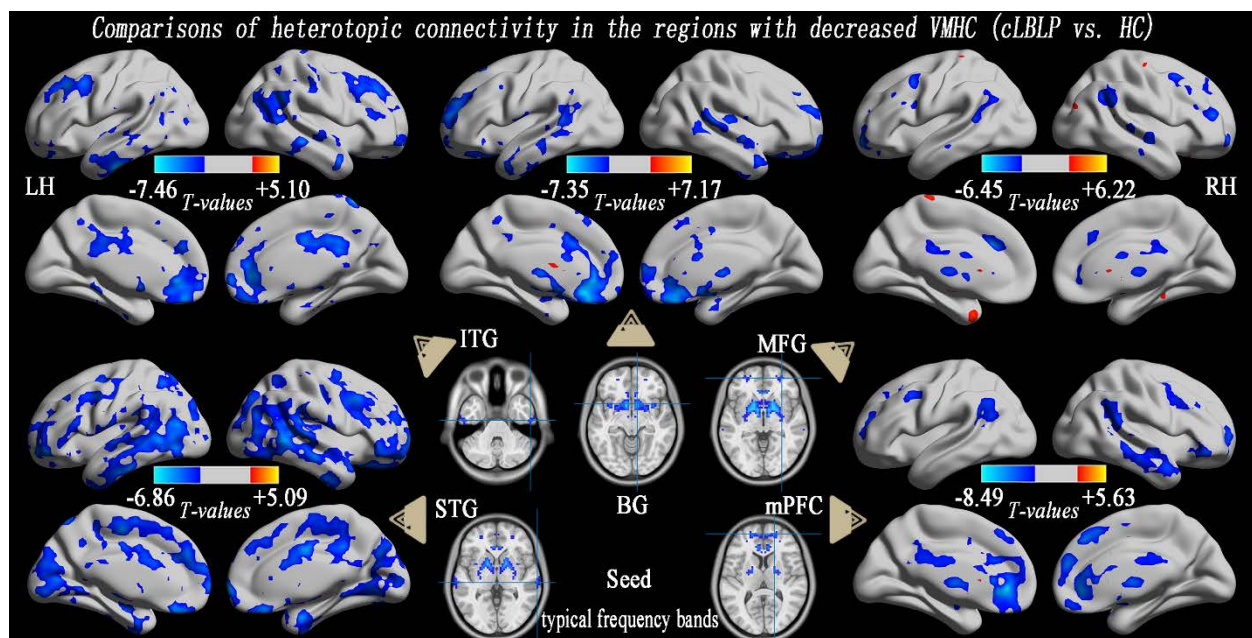

Figure S3:

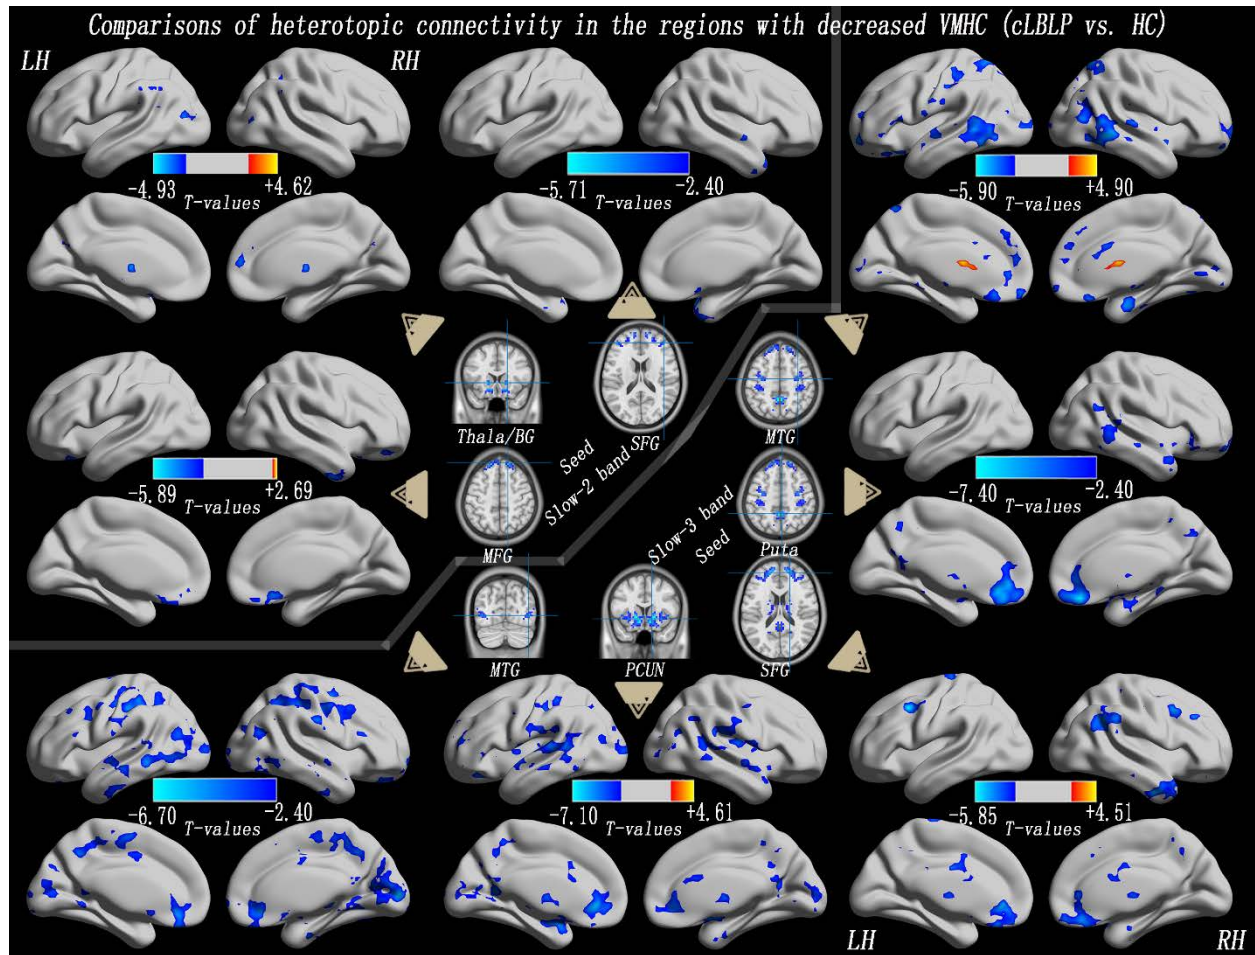

Figure S4:

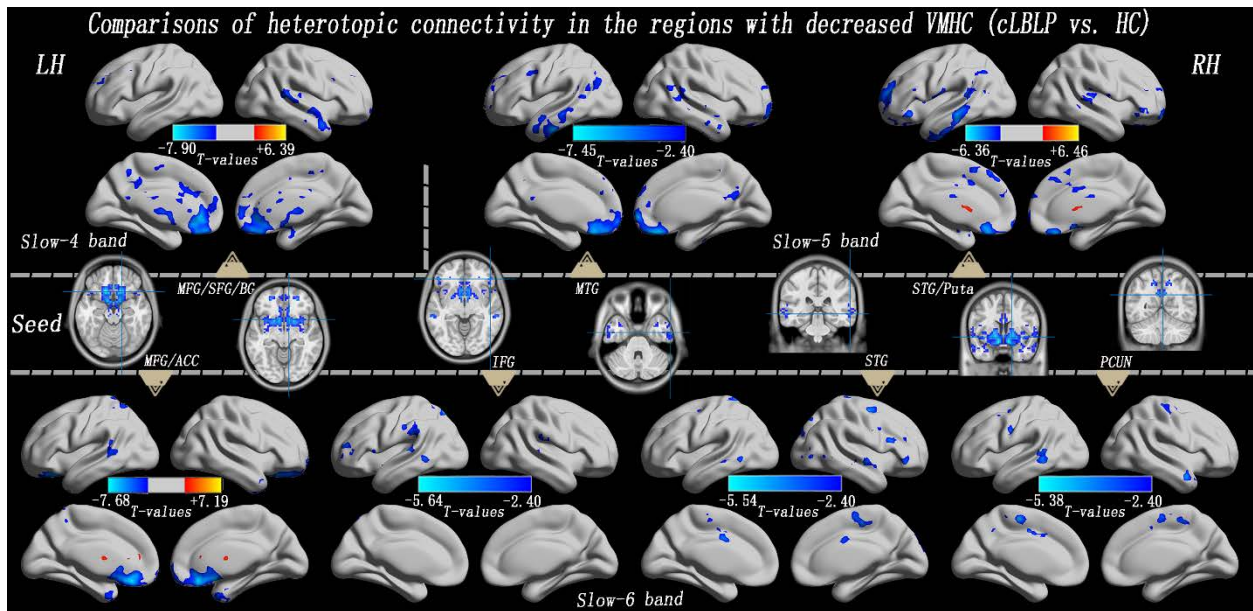

Supplement: Supplementary file 1 [file get_supplementary_file.php]
